# Supplementary material for: The Small RNA CyaR Activates Translation of the Outer Membrane Haem Receptor chuA in Enterohemorrhagic Escherichia coli
Source: Front Microbiol. 2022 Mar 29;13:821196. doi: 10.3389/fmicb.2022.821196 (PMC9002310; doi:10.3389/fmicb.2022.821196)
Supplement: Supplementary Table 1 — Primers, bacterial strains, and plasmids used in this work. [file Table_1.XLSX]

## Sheet: BSRD
Escherichia coli O157:H7 str. Sakai	SgrS	83195	83421	forward	Y
Escherichia coli O157:H7 str. Sakai	sroE	3356736	3356827	reverse	Y
Escherichia coli O157:H7 str. Sakai	sroB	572995	573077	forward	Y
Escherichia coli O157:H7 str. Sakai	sroC	768041	768203	reverse	Y
Escherichia coli O157:H7 str. Sakai	RybB	1013263	1013341	reverse	Y
Escherichia coli O157:H7 str. Sakai	DicF	1165731	1165782	reverse	Y
Escherichia coli O157:H7 str. Sakai	cspA	1229659	1230088	forward	Y
Escherichia coli O157:H7 str. Sakai	isrK	1263189	1263265	forward	Y
Escherichia coli O157:H7 str. Sakai	SraB	1505684	1505852	forward	Y
Escherichia coli O157:H7 str. Sakai	DicF	1762085	1762134	reverse	Y
Escherichia coli O157:H7 str. Sakai	McaS	1915102	1915281	forward	Y
Escherichia coli O157:H7 str. Sakai	FnrS	1918601	1918718	forward	Y
Escherichia coli O157:H7 str. Sakai	DicF	1927881	1927936	reverse	Y
Escherichia coli O157:H7 str. Sakai	MicC	1974621	1974742	forward	Y
Escherichia coli O157:H7 str. Sakai	RydC	2008952	2009015	reverse	Y
Escherichia coli O157:H7 str. Sakai	DicF	2201445	2201496	forward	Y
Escherichia coli O157:H7 str. Sakai	DicF	2250671	2250722	forward	Y
Escherichia coli O157:H7 str. Sakai	sroD	2489846	2489931	reverse	Y
Escherichia coli O157:H7 str. Sakai	SraC	2524931	2525075	forward	Y
Escherichia coli O157:H7 str. Sakai	RyeB	2524935	2525034	reverse	Y
Escherichia coli O157:H7 str. Sakai	isrK	2598473	2598547	forward	Y
Escherichia coli O157:H7 str. Sakai	dsrA	2649773	2649859	reverse	Y
Escherichia coli O157:H7 str. Sakai	CyaR	2842547	2842632	forward	Y
Escherichia coli O157:H7 str. Sakai	MicF	3046070	3046163	forward	Y
Escherichia coli O157:H7 str. Sakai	isrK	318521	318598	forward	Y
Escherichia coli O157:H7 str. Sakai	ryfA	3374508	3374812	forward	Y
Escherichia coli O157:H7 str. Sakai	GlmZ	3411521	3411705	reverse	Y
Escherichia coli O157:H7 str. Sakai	GlmY	3411559	3411706	reverse	Y
Escherichia coli O157:H7 str. Sakai	SraD	3538959	3539033	forward	Y
Escherichia coli O157:H7 str. Sakai	GcvB	3665096	3665301	forward	Y
Escherichia coli O157:H7 str. Sakai	SraE	3698502	3698589	reverse	Y
Escherichia coli O157:H7 str. Sakai	SraE	3698705	3698786	reverse	Y
Escherichia coli O157:H7 str. Sakai	SraH	4092930	4093037	forward	Y
Escherichia coli O157:H7 str. Sakai	RyhB	4300178	4300242	reverse	Y
Escherichia coli O157:H7 str. Sakai	GadY	4406996	4407109	forward	Y
Escherichia coli O157:H7 str. Sakai	GlmZ	4780072	4780278	forward	Y
Escherichia coli O157:H7 str. Sakai	GlmY	4780074	4780222	forward	Y
Escherichia coli O157:H7 str. Sakai	Spot_42	4845842	4845960	forward	Y
Escherichia coli O157:H7 str. Sakai	OxyS	4964922	4965031	reverse	Y
Escherichia coli O157:H7 str. Sakai	sroH	4999152	4999312	reverse	Y
Escherichia coli O157:H7 str. Sakai	SraL	5131072	5131212	reverse	Y
Escherichia coli O157:H7 str. Sakai	sraA	524773	524868	reverse	Y
Escherichia coli O157:H7 str. Sakai	RprA	2370084	2370191	forward	Y
Escherichia coli O157:H7 str. Sakai	rydB	2364424	2364491	forward	Y
Escherichia coli O157:H7 str. Sakai	SraG	4053724	4053895	forward
Escherichia coli O157:H7 str. Sakai	Thr_leader	215	328	forward
Escherichia coli O157:H7 str. Sakai	tpke11	14107	14184	forward
Escherichia coli O157:H7 str. Sakai	sok	15569	15721	reverse
Escherichia coli O157:H7 str. Sakai	RtT	865405	865547	forward
Escherichia coli O157:H7 str. Sakai	MOCO_RNA_motif	939277	939421	forward
Escherichia coli O157:H7 str. Sakai	tp2	127390	127503	reverse
Escherichia coli O157:H7 str. Sakai	t44	193240	193333	forward
Escherichia coli O157:H7 str. Sakai	StyR-44	228974	229082	forward
Escherichia coli O157:H7 str. Sakai	C4	318667	318754	forward
Escherichia coli O157:H7 str. Sakai	Mg_sensor	5322954	5323069	forward
Escherichia coli O157:H7 str. Sakai	symR	5437627	5437703	forward
Escherichia coli O157:H7 str. Sakai	sok	690192	690346	forward
Escherichia coli O157:H7 str. Sakai	sok	690694	690849	forward
Escherichia coli O157:H7 str. Sakai	rnk_leader	725367	725475	reverse
Escherichia coli O157:H7 str. Sakai	TPP riboswitch	80330	80429	reverse
Escherichia coli O157:H7 str. Sakai	Leu_leader	88180	88329	reverse
Escherichia coli O157:H7 str. Sakai	sok	1174519	1174693	forward
Escherichia coli O157:H7 str. Sakai	ALIL pseudoknot	1182464	1182580	forward
Escherichia coli O157:H7 str. Sakai	Lambda_thermo	1253909	1253967	reverse
Escherichia coli O157:H7 str. Sakai	C4	1263291	1263374	forward
Escherichia coli O157:H7 str. Sakai	ALIL pseudoknot	1271219	1271335	reverse
Escherichia coli O157:H7 str. Sakai	sok	1305427	1305601	reverse
Escherichia coli O157:H7 str. Sakai	sok	1397012	1397169	forward
Escherichia coli O157:H7 str. Sakai	STAXI	1399050	1399113	forward
Escherichia coli O157:H7 str. Sakai	STAXI	1399114	1399244	forward
Escherichia coli O157:H7 str. Sakai	ALIL pseudoknot	1432756	1432872	reverse
Escherichia coli O157:H7 str. Sakai	IS102	1444001	1444131	forward
Escherichia coli O157:H7 str. Sakai	rne5	1503498	1503834	reverse
Escherichia coli O157:H7 str. Sakai	sok	1551002	1551176	forward
Escherichia coli O157:H7 str. Sakai	sar	1577122	1577189	reverse
Escherichia coli O157:H7 str. Sakai	ALIL pseudoknot	1663668	1663784	forward
Escherichia coli O157:H7 str. Sakai	C0299	1672115	1672193	forward
Escherichia coli O157:H7 str. Sakai	ALIL pseudoknot	1686323	1686439	reverse
Escherichia coli O157:H7 str. Sakai	rdlD	1715205	1715270	forward
Escherichia coli O157:H7 str. Sakai	rdlD	1715740	1715799	forward
Escherichia coli O157:H7 str. Sakai	RtT	1731933	1732064	reverse
Escherichia coli O157:H7 str. Sakai	RtT	1732111	1732242	reverse
Escherichia coli O157:H7 str. Sakai	RtT	1732408	1732538	reverse
Escherichia coli O157:H7 str. Sakai	sok	1769166	1769318	forward
Escherichia coli O157:H7 str. Sakai	Trp_leader	1823988	1824081	reverse
Escherichia coli O157:H7 str. Sakai	ALIL pseudoknot	1910025	1910141	reverse
Escherichia coli O157:H7 str. Sakai	sok	1934679	1934803	forward
Escherichia coli O157:H7 str. Sakai	sok	2009575	2009726	reverse
Escherichia coli O157:H7 str. Sakai	SECIS_3	2069405	2069463	forward
Escherichia coli O157:H7 str. Sakai	STnc560	2148630	2148843	reverse
Escherichia coli O157:H7 str. Sakai	sok	2194061	2194235	reverse
Escherichia coli O157:H7 str. Sakai	ALIL pseudoknot	2205093	2205209	reverse
Escherichia coli O157:H7 str. Sakai	sok	2243651	2243825	reverse
Escherichia coli O157:H7 str. Sakai	Phe_leader	2398865	2398989	reverse
Escherichia coli O157:H7 str. Sakai	LR-PK1	2399706	2400048	reverse
Escherichia coli O157:H7 str. Sakai	ALIL pseudoknot	2454518	2454634	forward
Escherichia coli O157:H7 str. Sakai	C0465	2574669	2574744	forward
Escherichia coli O157:H7 str. Sakai	C4	2598583	2598670	forward
Escherichia coli O157:H7 str. Sakai	ALIL pseudoknot	2604217	2604333	reverse
Escherichia coli O157:H7 str. Sakai	ALIL pseudoknot	2693812	2693928	forward
Escherichia coli O157:H7 str. Sakai	sok	2700921	2701095	reverse
Escherichia coli O157:H7 str. Sakai	ALIL pseudoknot	2742156	2742272	forward
Escherichia coli O157:H7 str. Sakai	His_leader	2762087	2762210	forward
Escherichia coli O157:H7 str. Sakai	JUMPstart	2787333	2787371	reverse
Escherichia coli O157:H7 str. Sakai	JUMPstart	2812797	2812835	reverse
Escherichia coli O157:H7 str. Sakai	Sib	2828381	2828529	forward
Escherichia coli O157:H7 str. Sakai	Sib	2828715	2828857	forward
Escherichia coli O157:H7 str. Sakai	Sib	2829043	2829185	forward
Escherichia coli O157:H7 str. Sakai	TPP riboswitch	2858869	2858965	reverse
Escherichia coli O157:H7 str. Sakai	ALIL pseudoknot	2891634	2891750	reverse
Escherichia coli O157:H7 str. Sakai	ALIL pseudoknot	2912537	2912653	forward
Escherichia coli O157:H7 str. Sakai	Lambda_thermo	2936431	2936489	forward
Escherichia coli O157:H7 str. Sakai	ALIL pseudoknot	3089173	3089289	forward
Escherichia coli O157:H7 str. Sakai	nuoG	3126343	3126385	reverse
Escherichia coli O157:H7 str. Sakai	iscRS	3382188	3382297	reverse
Escherichia coli O157:H7 str. Sakai	rncO	3424393	3424607	reverse
Escherichia coli O157:H7 str. Sakai	StyR-44	3449388	3449496	reverse
Escherichia coli O157:H7 str. Sakai	Phe_leader	3457717	3457842	forward
Escherichia coli O157:H7 str. Sakai	SsrA	3475602	3475964	forward
Escherichia coli O157:H7 str. Sakai	ALIL pseudoknot	3481024	3481140	forward
Escherichia coli O157:H7 str. Sakai	sok	3607423	3607574	reverse
Escherichia coli O157:H7 str. Sakai	CsrB	3646556	3646915	reverse
Escherichia coli O157:H7 str. Sakai	6S RNA	3793112	3793295	forward
Escherichia coli O157:H7 str. Sakai	Sib	3793944	3794094	forward
Escherichia coli O157:H7 str. Sakai	Sib	3794337	3794487	forward
Escherichia coli O157:H7 str. Sakai	ALIL pseudoknot	3870191	3870307	reverse
Escherichia coli O157:H7 str. Sakai	isrC	3875218	3875340	forward
Escherichia coli O157:H7 str. Sakai	FMN riboswitch	3930664	3930812	reverse
Escherichia coli O157:H7 str. Sakai	Sib	3934278	3934427	reverse
Escherichia coli O157:H7 str. Sakai	Sib	3934654	3934803	reverse
Escherichia coli O157:H7 str. Sakai	yybP-ykoY leader	3977998	3978137	forward
Escherichia coli O157:H7 str. Sakai	RNaseP_bact_a	4009451	4009827	reverse
Escherichia coli O157:H7 str. Sakai	ALIL pseudoknot	4033541	4033657	forward
Escherichia coli O157:H7 str. Sakai	S15	4054125	4054239	reverse
Escherichia coli O157:H7 str. Sakai	rimP	4060522	4060622	reverse
Escherichia coli O157:H7 str. Sakai	greA	4071309	4071430	reverse
Escherichia coli O157:H7 str. Sakai	StyR-44	4161795	4161903	reverse
Escherichia coli O157:H7 str. Sakai	Alpha_RBS	4177451	4177562	reverse
Escherichia coli O157:H7 str. Sakai	rdlD	4442282	4442347	forward
Escherichia coli O157:H7 str. Sakai	cspA	4467463	4467890	forward
Escherichia coli O157:H7 str. Sakai	sok	4468173	4468324	reverse
Escherichia coli O157:H7 str. Sakai	JUMPstart	4552036	4552074	reverse
Escherichia coli O157:H7 str. Sakai	isrC	4582371	4582493	forward
Escherichia coli O157:H7 str. Sakai	istR	4643593	4643722	reverse
Escherichia coli O157:H7 str. Sakai	ROSE_2	4658400	4658472	reverse
Escherichia coli O157:H7 str. Sakai	StyR-44	4737032	4737140	forward
Escherichia coli O157:H7 str. Sakai	StyR-44	4833526	4833634	forward
Escherichia coli O157:H7 str. Sakai	CsrC	4846989	4847242	forward
Escherichia coli O157:H7 str. Sakai	SECIS_3	4883818	4883876	reverse
Escherichia coli O157:H7 str. Sakai	Cobalamin riboswitch	4972649	4972839	forward
Escherichia coli O157:H7 str. Sakai	StyR-44	4977707	4977815	forward
Escherichia coli O157:H7 str. Sakai	P26	4989826	4989887	forward
Escherichia coli O157:H7 str. Sakai	TPP riboswitch	5005005	5005105	reverse
Escherichia coli O157:H7 str. Sakai	StyR-44	5018733	5018841	forward
Escherichia coli O157:H7 str. Sakai	Lysine riboswitch	5086585	5086781	reverse
Escherichia coli O157:H7 str. Sakai	SECIS_2	5151585	5151639	reverse
Escherichia coli O157:H7 str. Sakai	mini-ykkC	5231092	5231138	forward
Escherichia coli O157:H7 str. Sakai	ALIL pseudoknot	5349604	5349720	forward
Escherichia coli O157:H7 str. Sakai	ffs	542521	542617	forward
Escherichia coli O157:H7 str. Sakai	DnaX	559251	559315	forward

## Sheet: Sheet1
Serotype	Strain	Genotype	Reference
E. coli O157:H7	Sakai	Δstx1 stx2A::kan, KanR	Dahan et al., 2004
E. coli K12	TOP10F'
E. coli K12	DH5α	fhuA2 lac(del)U169 phoA glnV44 80' lacZ(del)M15 gyrA96 recA1 relA1 endA1 thi-1 hsdR17	Taylor et al., 1993
Plasmid	Description	Reference
pXG10SF	PLtetO-1 sfGFP fusion vector, CmR	Corcoran et al., 2012
pZE12luc	PLlacO-1 luciferase expression vector, ApR	Expressys, Germany
pJV300	scrambled sRNA control for pZE12 expressed sRNAs	Sittka et al., 2007
pTOF25	temperature senstive allelic exchange vector, CmR	Merlin et al., 2002
pCP20	contains flippase, AmpR, CmR, temperature sensitive	Cherepanov and Wackernagel, 1995
pXG10SF::chuA	chuA -328 -> +15	This study
pZE12::CyaR	pZE12 with CyaR cloned at the +1 site	This study
pZE12::SgrS	pZE12 with SgrS cloned at the +1 site	This study
pZE12::RyeB	pZE12 with RyeB cloned at the +1 site	This study
pZE12::ChiX	pZE12 with ChiX cloned at the +1 site	This study
pZE12::RyhB	pZE12 with RyhB cloned at the +1 site	This study
pZE12::DicF	pZE12 with DicF cloned at the +1 site	This study
pZE12::sroC	pZE12 with sroC cloned at the +1 site	This study
pZE12::MicC	pZE12 with MicC cloned at the +1 site	This study
pZE12::FnrS	pZE12 with FnrS cloned at the +1 site	This study
pZE12::AsxR	pZE12 with AsxR cloned at the +1 site	Tree et al., 2014
pXG10SF::chuA::G298C	chuA -30 G -> C	This study
pXG10SF::chuA::T310A	chuA -18 T -> A; destabilizes RNA thermometer	This study
pXG10SF::chuA::81-328	chuA -247 -> +15	This study
pXG10SF::chuA::152-328	chuA -176-> +15	This study
pXG10SF::chuA::214-328	chuA -114 -> +15	This study
pXG10SF::chuA::253-328	chuA -75 -> +15	This study
pXG10SF::chuA::ChiX::M1	chuA -177 -> -175 AGA -> CCT	This study
pXG10SF::chuA::ChiX::M2	chuA -144 -> -142 CAG -> CCT	This study
pXG10SF::chuA::ChiX::M3	chuA -137 -> -135 TTT -> GGG	This study
pXG10SF::chuA::AsxR::M1	chuA -133 -> -131 ATG -> CGA	This study
pZE12::CyaR::C27G	CyaR +27 C -> G	This study
pZE12::ChiXM1	ChiX +47-49 TCT-->AGG	This study
pZE12::ChiXM2	ChiX +41-43 AAA-->CCC	This study
Primer	Sequence	Notes
ChuA.5UTRcds.NsiI.F	5’-GCGAAGATGCATTTGATCATAAAAAATTGATCGA-3’	cloning chuA into pXG10SF
ChuA.5utrCDS.NheI.R	5’-GAAAAAGCTAGCGGCCAATAAACTCAAACGCAAC-3’	cloning EHEC chuA into pXG10SF
UPEC.ChuA.5utrCDS.NheI.R	5' -GAAAAAGCTAGCCAACAAACTCAAACGCAACGAGG - 3'	cloning UPEC chuA into pXG10SF
CyaR.5P.F	5’- GCTGAAAAACATAACCCATAAAATGC-3’	cloning CyaR into pZE12luc; 5' phosphorylated
CyaR.XbaI.R	5’- GAAAAATCTAGACGGTTATCAGGGATAGGGC-3’	cloning CyaR into pZE12luc
DicF.5P.F	5’-TTCTGGTGACGTTTGGCGGCATC-3’	cloning DicF into pZE12luc; 5' phosphorylated
DicF.XbaI.R	5’- GAAAAATCTAGACACTGCATCACAAAATTCAC-3’	cloning DicF into pZE12luc
MicC.5P.F	5’-GTTATATGCCTTTATTGTCAC-3’	cloning MicC into pZE12luc; 5' phosphorylated
MicC.XbaI.R	5’-GTTTTTTCTAGACACCGATTAAATGCTCTGGA-3’	cloning MicC into pZE12luc
SgrS.5P.F	5’-GATGAAGCAAGGAGGTGCCCCATTC-3’	cloning SgrS into pZE12luc; 5' phosphorylated
SgrS.XbaI.R	5’- GTTTTTTCTAGAGTACACCGTCCGATACTCAATC-3’	cloning SgrS into pZE12luc
pLlacO-B	5’- CGCACTGACCGAATTCATTAA-3’	linearising pZE12luc
pLlacO-D	5’-GTGCTCAGTATCTTGTTATCCG-3’	linearising pZE12luc
T1.ChuA.5UTR.F	5'-GCGAAGATGCATAAGGGATAACGCACAGCTCTCTTC-3'	cloning chuA-T1 into pXG10SF
T2.ChuA.5UTR.F	5'-GCGAAGATGCATAGGGCGTGCTTTTGCGTAAT-3'	cloning chuA-T2 into pXG10SF
T3.ChuA.5UTR.F	5'-GCGAAGATGCATAACTCACCCGGCGAATATTATC-3'	cloning chuA-T3 into pXG10SF
T4.ChuA.5UTR.F	5'-GCGAAGATGCATAATTTATTTTTCGCCAGCCACC-3'	cloning chuA-T4 into pXG10SF
ZeCat	5'-TGGGATATATCAACGGTGGT -3'	for sequencing of pXG plasmids
ChuA.G298C.F	5'-CATGAGGAAAATAAAAAATGGTGGCTGCCTGGGTTAATAC-3'	for generating chuA point mutation at the CyaR binding site
ChuA.G298C.R	5'-GTATTAACCCAGGCAGCCACCATTTTTTATTTTCCTCATG-3’	for generating chuA point mutation at the CyaR binding site
CyaR.C27G.F	5'-AAACATAACCCATAAAATGGTAGCTGTACCAGGAACCAC-3'	for generating CyaR point mutation
CyaR.C27G.R	5'-GTGGTTCCTGGTACAGCTACCATTTTATGGGTTATGTTT-3'	for generating CyaR point muation
ChuA.T310A.F	5'- TCTCCATGAGGATAATAAAAAATGCTGGCTGCCTGG-3'	for generating chuA point mutation that disrupts the RNA thermometer
ChuA.T310A.R	5'- CCAGGCAGCCAGCATTTTTTATTATCCTCATGGAGA-3'	for generating chuA point mutation that disrupts the RNA thermometer
ChuA.CAG184CCT.F	5'-TTTATATCCCATGAAATTGCAGGATAACTCGGCAATTACGCAAAAGCAC-3'	for generating chuA point mutation at ChiX-M1 site	5'-tttatatcccatgaaattgcaggataactcggcaattacgcaaaagcac-3'
ChuA.CAG184CCT.R	5'-GTGCTTTTGCGTAATTGCCGAGTTATCCTGCAATTTCATGGGATATAAA-3'	for generating chuA point mutation at ChiX-M1 site	5'-gtgcttttgcgtaattgccgagttatcctgcaatttcatgggatataaa-3'
ChiX.TCT47AGG.F	5'-AATATCGCTATTGGCCCGTCAACCTGGAATTTCATTTTTTTATTATTATGCCGTCA-3'	for generating ChiX-M1 point mutation	5'-aatatcgctattggcccgtcaacctggaatttcatttttttattattatgccgtca-3'
ChiX.TCT47AGG.R	5'-TGACGGCATAATAATAAAAAAATGAAATTCCAGGTTGACGGGCCAATAGCGATATT-3'	for generating ChiX-M1 point mutation	5'-tgacggcataataataaaaaaatgaaattccaggttgacgggccaatagcgatatt-3'
ChuA.TTT191GGG.F	5'-GTTTACAAGCGTTTATATCCCATGCCCTTGCCTGATAACTCGGCAATTACG-3'	for generating chuA point mutation at ChiX-M2 site
ChuA.TTT191GGG.R	5'-CGTAATTGCCGAGTTATCAGGCAAGGGCATGGGATATAAACGCTTGTAAAC-3'	for generating chuA point mutation at ChiX-M2 site
ChiX.AAA41CCC.F	5'-CGCTATTGGCCCGTCAAAGAGGAAGGGCATTTTTTTATTATTATGCCGTCACTTTAA-3'	for generating ChiX-M2 point mutation
ChiX.AAA41CCC.R	5'-TTAAAGTGACGGCATAATAATAAAAAAATGCCCTTCCTCTTTGACGGGCCAATAGCG-3'	for generating ChiX-M2 point mutation
